# Supplementary material
Source: PubMed Central journal article supplement (PMC5540054)
Supplement: jamaophthalmol-135-576-s001.pdf [file jamaophthalmol-135-576-s001.pdf]

## Supplementary Online Content

Hutton DW, Stein JD, Bressler NM, Jampol LM, Browning D, Glassman AR; the Diabetic Retinopathy Clinical Research Network. Cost-effectiveness of intravitreal ranibizumab compared with panretinal photocoagulation for proliferative diabetic retinopathy: secondary analysis from a Diabetic Retinopathy Clinical Research Network randomized clinical trial. *JAMA Ophthalmol*. Published online May 8, 2017. doi:10.1001/jamaophthalmol.2017.0837

**eAppendix.** Details of Utility Assessment Methods

**eTable 1:** Input Parameters

**eTable 2:** Detailed Procedure Costs

**eTable 3:** Study Population Baseline Characteristics

**eTable 4:** Patient-reported Vision-related Outcomes

**eTable 5:** Change in Quality Adjusted Life Years over Two-Years

**eTable 6:** Cost-Effectiveness Results with Alternative Utility Measurements

**eTable 7:** Incremental Cost-Effectiveness Ratios Values as Each Parameter

Assumption is Changed from Low to High, One-at-a-time

**eTable 8:** Incremental Cost-Effectiveness Ratio Values as Costs of Panretinal Photocoagulation and Anti-Vascular Endothelial Growth Factor Therapy Change for Eyes with Vision-Impairing Diabetic Macular Edema at Baseline

**eTable 9:** Incremental Cost-Effectiveness Ratio values as costs of Panretinal Photocoagulation and Anti-Vascular Endothelial Growth Factor Therapy Change for Eyes Without Vision-Impairing Diabetic Macular Edema at Baseline

**eTable 10:** Letter Changes in Eyes

**eTable 11:** Percentage Changes in Quality-of-Life

This supplementary material has been provided by the authors to give readers additional information about their work.

## **Details of Utility Assessment Methods**

To capture changes in health-related quality-of-life associated with receipt of the two interventions over the course of the trial, four methods were used. In method one, visual acuities from the better-seeing eye over the two years of the trial were converted into quality-adjusted life-years (QALYs) using commonly-used mappings of Snellen vision categories to utilities by Brown et al.<sup>1</sup> Those utilities are measured on a scale from death to perfect vision. Best-corrected visual acuities in the better-seeing eye at the 16, 32, 52, 68, 84, and 104-week visit were converted to the closest Snellen categories, then converted to utilities. These were then converted into gains/losses compared with the baseline utility associated with the patient's best-corrected visual acuity in the better-seeing eye at randomization (see details in Table S1).

Method two was similar to method one, but instead of using the better-seeing eye, best-corrected visual acuities from the treated eye were used from a study that used the EuroQoL (EQ-5D) questionnaire to assess utility in DME patients.<sup>2</sup>

Method three was similar to methods one and two, but used a formula estimating the relationship between LogMAR visual acuity of the best-seeing eye to utilities, where utilities are measured on a scale from death to perfect health.<sup>3</sup>

Method four used utilities collected directly from participant responses at the randomization, 52- and 104-week visits. Iterative time-trade-off questions compared life with current vision to perfect health. Because this was not a primary or secondary outcome from the main trial, power calculations had not been performed a priori to evaluate if the study size was large enough to detect differences in time tradeoff utility between the groups.

**Table 1: Input Parameters**

| <b>Parameter</b>                          | <b>Parameter Value*†</b> | <b>Range Explored in Cost-Effectiveness Acceptability Curves ‡</b> | <b>Source</b>                                 |
|-------------------------------------------|--------------------------|--------------------------------------------------------------------|-----------------------------------------------|
| <b>Unit Costs (per procedure)</b>         |                          |                                                                    |                                               |
| Cataract extraction with IOL placement    | \$3,098                  | (2788-3408)                                                        | Medicare<br>4 CPT<br>66984                    |
| Cataract extraction without IOL placement | \$2,394                  | (2155-2634)                                                        | Medicare<br>CPT<br>66984                      |
| Diode laser (open angle glaucoma)         | \$1,800                  | (1620-1980)                                                        | Medicare<br>CPT<br>66710                      |
| Endolaser                                 | \$5,752                  | (5177-6327)                                                        | Medicare<br>CPT<br>67108                      |
| Extended ophthalmoscopy                   | \$27                     | (24-30)                                                            | Medicare<br>CPT<br>92225                      |
| Fluorescein angiography                   | \$111                    | (100-122)                                                          | Medicare<br>CPT<br>92235                      |
| Focal/grid laser                          | \$525                    | (472-577)                                                          | Medicare<br>CPT<br>67210                      |
| Fundus photography                        | \$79                     | (72-87)                                                            | Medicare<br>CPT<br>92250                      |
| Intravitreal injection procedure          | \$103                    | (93-114)                                                           | Medicare<br>CPT<br>67028                      |
| 0.5-mg ranibizumab drug                   | \$1,916.14               | (1755-2145)                                                        | Medicare<br>pricing<br>files of<br>ASP<br>+6% |
| Laser retinopathy                         | \$534                    | (480-587)                                                          | Medicare<br>CPT<br>67145                      |
| OCT                                       | \$45                     | (41-50)                                                            | Medicare<br>CPT                               |

|                                                                       |          |               |                          |
|-----------------------------------------------------------------------|----------|---------------|--------------------------|
|                                                                       |          |               | 92134                    |
| Paracentesis                                                          | \$121    | (109-133)     | Medicare<br>CPT<br>65800 |
| Panretinal photocoagulation                                           | \$345    | (311-380)     | Medicare<br>CPT<br>67228 |
| Retinal cryopexy                                                      | \$793    | (714-873)     | Medicare<br>CPT<br>67101 |
| Retinal detachment repair-injection of air/gas                        | \$2,452  | (2207-2697)   | Medicare<br>CPT<br>67110 |
| Silicone oil injection                                                | \$3,443  |               |                          |
| Total air-fluid exchange                                              | \$3,443  | (3099-3787)   | Medicare<br>CPT<br>67108 |
| Ocular ultrasound                                                     | \$94     | (84-103)      | Medicare<br>CPT<br>76512 |
| Vitrectomy                                                            | \$3,716  | (3344-4087)   | Medicare<br>CPT<br>67036 |
| vitrectomy with endolaser                                             | \$5,416  | (4874-5957)   | Medicare<br>CPT<br>67108 |
| Vitrectomy with epiretinal membrane peel                              | \$3,971  | (3574-4368)   | Medicare<br>CPT<br>67041 |
| <b>Annual Costs (first year)</b>                                      |          |               |                          |
| MI                                                                    | \$53,764 | (40323-67205) | Bonafede <sub>5</sub>    |
| CVA                                                                   | \$59,147 | (44360-73934) | Bonafede                 |
| <b>Annual Costs (year 2)</b>                                          |          |               |                          |
| MI                                                                    | \$19,615 | (14711-24519) | Bonafede                 |
| CVA                                                                   | \$37,007 | (27755-46259) | Bonafede                 |
| <b>Utility associated with Visual Acuity in the Better-Seeing Eye</b> |          |               |                          |
| 20/20                                                                 | 0.92     | (0.87-0.97)   | Brown <sup>1</sup>       |
| 20/25                                                                 | 0.87     | (0.82-0.92)   | Brown                    |
| 20/30                                                                 | 0.84     | (0.79-0.89)   | Brown                    |
| 20/40                                                                 | 0.8      | (0.74-0.86)   | Brown                    |

|        |      |             |       |
|--------|------|-------------|-------|
| 20/50  | 0.77 | (0.7-0.84)  | Brown |
| 20/70  | 0.74 | (0.67-0.81) | Brown |
| 20/100 | 0.67 | (0.57-0.77) | Brown |
| 20/200 | 0.66 | (0.55-0.77) | Brown |
| 20/300 | 0.63 | (0.54-0.72) | Brown |
| 20/400 | 0.54 | (0.43-0.65) | Brown |

IOL = intraocular lens; CPT = current procedural terminology; ASP = average sales price; OCT = optical coherence tomography; MI = myocardial infarction; CVA = cerebrovascular accident.

\* The cost values are calculated from the various Medicare fees. Table 2 provides details of how the parameter values were determined.

† All costs in 2016 United States Dollars (inflated using gross domestic product deflator if necessary).

‡ Normal distributions were used where the ranges in this table represent 95% confidence intervals. All distributions were assumed to be independent with the exception of the utilities, where a correlation of .75 was used between adjacent vision levels.

**Table 2: Detailed Procedure Costs**

| <b>Parameter</b>                             | <b>Source CPT/HCPCS*</b>        | <b>Physician Non-Facility Fee</b> | <b>Physician Facility Fee</b> | <b>OPPS Payment</b> | <b>Anesthesia Fees</b> | <b>Facility</b> | <b>Total Cost</b> |
|----------------------------------------------|---------------------------------|-----------------------------------|-------------------------------|---------------------|------------------------|-----------------|-------------------|
| Cataract extraction with IOL placement       | 66984 + Anesthesia <sup>†</sup> | \$648.42                          | \$648.42                      | \$1,745.70          | 703.792                | Yes             | \$3,097.91        |
| Cataract extraction without IOL placement    | 66984                           | \$648.42                          | \$648.42                      | \$1,745.70          | N/A                    | Yes             | \$2,394.12        |
| Diode laser (open angle glaucoma)            | 66710                           | \$445.41                          | \$398.50                      | \$1,401.16          | N/A                    | Yes             | \$1,799.66        |
| Endolaser                                    | 67108 + Anesthesia <sup>†</sup> | \$1,315.81                        | \$1,315.81                    | \$3,380.77          | 1055.69                | Yes             | \$4,696.58        |
| Extended ophthalmoscopy                      | 92225                           | \$27.21                           | \$21.48                       | \$55.94             | N/A                    | No              | \$27.21           |
| Fluorescein angiography                      | 92235                           | \$110.64                          | \$110.64                      | \$220.35            | N/A                    | No              | \$110.64          |
| Focal/grid laser (non-center involved DME)   | 67210                           | \$524.89                          | \$507.35                      | \$440.38            | N/A                    | No              | \$524.89          |
| Fundus photography                           | 92250                           | \$79.49                           | \$79.49                       | \$91.18             | N/A                    | No              | \$79.49           |
| Intravitreal injection procedure             | 67028                           | \$103.47                          | \$101.68                      | \$280.27            | N/A                    | No              | \$103.47          |
| Bevacizumab drug (repackaged 1.25mg/0.05 mL) |                                 | \$59.65                           |                               |                     |                        |                 | \$59.65           |
| 0.05-mg ranibizumab drug                     |                                 | \$2,027.79                        |                               |                     |                        |                 | \$2,027.79        |
| Laser retinopexy                             | 67145                           | \$533.84                          | \$505.20                      | \$440.38            | N/A                    | No              | \$533.84          |
| OCT                                          | 92134                           | \$45.47                           | \$45.47                       | \$55.94             | N/A                    | No              | \$45.47           |

|                                                       |                                        |            |            |            |          |     |            |
|-------------------------------------------------------|----------------------------------------|------------|------------|------------|----------|-----|------------|
| Paracentesis                                          | 65800                                  | \$120.66   | \$93.09    | \$1,745.70 | N/A      | No  | \$120.66   |
| Panretinal photocoagulation                           | 67228                                  | \$345.15   | \$311.86   | \$440.38   | N/A      | No  | \$345.15   |
| Retinal cryopexy                                      | 67101                                  | \$793.42   | \$683.50   | \$1,745.70 | N/A      | No  | \$793.42   |
| Retinal detachment repair-injection of air/gas        | 67110                                  | \$770.15   | \$706.42   | \$1,745.70 | N/A      | Yes | \$2,452.12 |
| Silicone oil injection                                | 67025 + Anesthesia <sup>†</sup>        | \$735.06   | \$641.61   | \$1,745.70 | N/A      | No  | \$3,443.00 |
| Subtenons triamcinolone acetate injection for uveitis | 67515                                  | \$98.10    | \$90.58    | \$261.03   | N/A      | No  | \$98.10    |
| Total air-fluid exchange                              | 67025 + Anesthesia <sup>†</sup>        | \$735.06   | \$641.61   | \$1,745.70 | 1055.688 | Yes | \$3,443.00 |
| Ultrasound                                            | 76512                                  | \$93.81    | \$93.81    | \$92.07    | N/A      | No  | \$93.81    |
| Vitrectomy                                            | 67036                                  | \$914.44   | \$914.44   | \$1,745.70 | 1055.69  | Yes | \$3,715.83 |
|                                                       | Anesthesia <sup>†</sup><br>CPT – 00145 |            |            |            |          |     |            |
|                                                       | Procedure hours - 2                    |            |            |            |          |     |            |
| Vitrectomy with endolaser                             | 67039 + Anesthesia <sup>†</sup>        | \$979.25   | \$979.25   | \$3,380.77 | 1055.688 | Yes | \$5,415.71 |
| Vitrectomy with epiretinal membrane peel              | 67041 + Anesthesia <sup>†</sup>        | \$1,169.37 | \$1,169.37 | \$1,745.70 | 1055.69  | Yes | \$3,970.76 |

CPT= current procedural terminology; OPSS = outpatient prospective payment system; IOL = intraocular lens; DME = diabetic macular edema; OCT = optical coherence tomography.

<sup>†</sup> All anesthesia was assumed to use CPT 00145 and billed for 2 hours.

**Table 3: Study Population Baseline Characteristics\***

|                                                                    | With Vision-Impairing DME at Baseline <sup>†</sup> |                     | Without Vision-Impairing DME at Baseline |                     |
|--------------------------------------------------------------------|----------------------------------------------------|---------------------|------------------------------------------|---------------------|
|                                                                    | Ranibizumab<br>N = 21                              | PRP<br>N = 25       | Ranibizu<br>mab<br>N = 80                | PRP<br>N = 87       |
| <b>Participant Characteristics</b>                                 |                                                    |                     |                                          |                     |
| <b>Female, No. (%)</b>                                             | 6 (29)                                             | 13 (52)             | 36 (45)                                  | 37 (43)             |
| <b>Age, Median (IQR), y</b>                                        | 56 (52-61)                                         | 56 (49-62)          | 54 (45-60)                               | 52 (45-60)          |
| <b>Race/ethnicity, No. (%)</b>                                     |                                                    |                     |                                          |                     |
| White                                                              | 11 (52)                                            | 16 (64)             | 47 (59)                                  | 43 (49)             |
| Hispanic or Latino                                                 | 7 (33)                                             | 6 (24)              | 20 (25)                                  | 23 (26)             |
| Black/African American                                             | 3 (14)                                             | 2 (8)               | 12 (15)                                  | 18 (21)             |
| Other                                                              | 0 (0)                                              | 1 (4)               | 1 (1)                                    | 3 (3)               |
| <b>Diabetes type, No. (%)</b>                                      |                                                    |                     |                                          |                     |
| Type 1                                                             | 3 (14)                                             | 5 (20)              | 17 (21)                                  | 14 (16)             |
| Type 2                                                             | 17 (81)                                            | 18 (72)             | 59 (74)                                  | 71 (82)             |
| Uncertain                                                          | 1 (5)                                              | 2 (8)               | 4 (5)                                    | 2 (2)               |
| <b>Duration of diabetes, median (IQR), y</b>                       | 15 (11-21)                                         | 11 (7-27)           | 20 (13-27)                               | 16 (11-23)          |
| <b>Hemoglobin A1c, median (IQR), %</b>                             | 7.8 (7-9.3)                                        | 7.8 (7.1-9.6)       | 8.3 (7-9.8)                              | 8.9 (7.3-10.3)      |
| <b>Ocular characteristics</b>                                      |                                                    |                     |                                          |                     |
| <b>Baseline visual acuity letter score</b>                         |                                                    |                     |                                          |                     |
| Mean                                                               | 62.1                                               | 63.9                | 77.3                                     | 78.4                |
| Median (IQR)                                                       | 64 (57-76)                                         | 71 (57-74)          | 80 (74-85)                               | 81 (74-85)          |
| Approximate Snellen equivalent, median (IQR)                       | 20/50 (20/80–20/32)                                | 20/40 (20/80–20/32) | 20/25 (20/32–20/20)                      | 20/25 (20/32–20/20) |
| ≥84 (≥20/20)                                                       | 0 (0)                                              | 0 (0)               | 31 (39)                                  | 35 (40)             |
| 83-79 (20/25)                                                      | 0 (0)                                              | 0 (0)               | 17 (21)                                  | 18 (21)             |
| 78-69 (20/32-20/40)                                                | 10 (48)                                            | 14 (56)             | 19 (24)                                  | 21 (24)             |
| 68-49 (20/50-20/100)                                               | 6 (29)                                             | 7 (28)              | 10 (13)                                  | 12 (14)             |
| 48-24 (20/125-20/320)                                              | 5 (24)                                             | 4 (16)              | 3 (4)                                    | 1 (1)               |
| <b>OCT central subfield thickness (Stratus equivalent), micron</b> |                                                    |                     |                                          |                     |
| Mean                                                               | 417.4                                              | 327.2               | 213.7                                    | 219.6               |



|                                                                                 |               |               |               |               |
|---------------------------------------------------------------------------------|---------------|---------------|---------------|---------------|
| Median (IQR)                                                                    | 365 (333-504) | 296 (270-319) | 210 (193-235) | 222 (200-237) |
| <b>Diabetic retinopathy severity<sup>§</sup> on fundus photographs, No. (%)</b> |               |               |               |               |
| NPDR or better (level 53 or lower)                                              | 0 (0)         | 2 (8)         | 7 (9)         | 12 (14)       |
| Mild PDR (level 61)                                                             | 2 (10)        | 3 (12)        | 12 (15)       | 13 (15)       |
| Moderate PDR (level 65)                                                         | 7 (33)        | 11 (44)       | 28 (35)       | 34 (39)       |
| High-risk PDR (level 71 and 75)                                                 | 12 (57)       | 9 (36)        | 30 (38)       | 26 (30)       |
| Advanced PDR, macula center attached (level 81)                                 | 0 (0)         | 0 (0)         | 2 (3)         | 0 (0)         |
| Advanced PDR, macula center detached (level 85)                                 | 0 (0)         | 0 (0)         | 0 (0)         | 1 (1)         |
| <b>Prior treatment for DME, No. (%)</b>                                         | 5 (24)        | 7 (28)        | 21 (26)       | 16 (18)       |
| <b>Prior anti-VEGF treatment for DME, No. (%)</b>                               | 4 (19)        | 2 (8)         | 9 (11)        | 6 (7)         |

DME = diabetic macular edema; PRP = panretinal photocoagulation; IQR = interquartile range; OCT = optical coherence tomography; ETDRS = Early Treatment Diabetic Retinopathy Study; NPDR = non-proliferative diabetic retinopathy; PDR = proliferative diabetic retinopathy; anti-VEGF = anti-vascular endothelial growth factor

\*Participants included in this analyses had one study eye

†Visual acuity letter score 69 or less (approximate Snellen equivalent 20/32 or worse) at baseline

§Early Treatment Diabetic Retinopathy Study severity level determined by the Fundus Photograph Reading Center

**Table 4: Patient-reported Vision-related Outcomes**

|                           |                                            | <b>PRP</b>   | <b>PRP</b>     | <b>Ranibizumab</b> | <b>Ranibizumab</b> |
|---------------------------|--------------------------------------------|--------------|----------------|--------------------|--------------------|
|                           |                                            | <b>Count</b> | <b>Average</b> | <b>Count</b>       | <b>Average</b>     |
| <b>LLQ<sup>6</sup></b>    | <b>Driving Subscale Score</b>              | 83           | 0.57           | 80                 | -5.05              |
|                           | <b>General Dim Lighting Subscale Score</b> | 90           | -0.65          | 80                 | -0.63              |
|                           | <b>Peripheral Vision Subscale Score</b>    | 90           | -1.39          | 80                 | -3.13              |
|                           | <b>Color Vision Score</b>                  | 83           | 0.57           | 80                 | -5.05              |
| <b>VFQ-25<sup>7</sup></b> | <b>Driving Subscale</b>                    | 79           | 1.69           | 72                 | 0.81               |
|                           | <b>Peripheral Vision</b>                   | 94           | -0.80          | 82                 | -2.74              |
|                           | <b>Color Vision</b>                        | 95           | -0.26          | 83                 | -1.51              |
|                           | <b>Gave up Driving</b>                     | 92           | 0.08           | 82                 | 0.40               |
|                           | <b>Stopped Driving at Night</b>            | 92           | 0.06           | 82                 | 0.06               |
| <b>WPAI<sup>8</sup></b>   | <b>Work time missed due to vision, %</b>   | 47           | -4.03          | 36                 | 0.10               |
|                           | <b>Impaired, %</b>                         | 45           | 6.67           | 34                 | -9.41              |
|                           | <b>Overall Work Impairment, %</b>          | 45           | 4.96           | 34                 | -10.75             |
|                           | <b>Activity Impairment</b>                 | 94           | -6.60          | 83                 | -1.08              |

PRP = panretinal photocoagulation; LLQ = low luminance questionnaire; VFQ-25 = National Eye Institutes Visual Function Questionnaire; WPAI = Work Productivity and Activity Impairment Questionnaire

When visual acuities in the treated eye were transferred to quality adjusted life years, participants randomized to ranibizumab had slightly better utility changes versus PRP; all *P*-values for the difference between the groups were greater than 0.05.

**Table 5: Change in Quality Adjusted Life Years over Two-Years**

|                                                                   | With vision-impairing DME at baseline* |                       |                       | Without vision-impairing DME at baseline |                       |                      |
|-------------------------------------------------------------------|----------------------------------------|-----------------------|-----------------------|------------------------------------------|-----------------------|----------------------|
|                                                                   | PRP (N = 25)                           | Ranibizum ab (N = 21) | Difference            | PRP (N = 87)                             | Ranibizum ab (N = 80) | Difference           |
| <b>Utilities Converted from Visual Acuity in The Treated Eye</b>  |                                        |                       |                       |                                          |                       |                      |
| <b>Change in QALYS* (95% CI)</b>                                  | -0.061                                 | -0.034                | 0.026 (-0.129,0.182)  | -0.047                                   | -0.018                | 0.029 (-0.026,0.084) |
| <b>Utilities Measured on a Scale from Death to Perfect Health</b> |                                        |                       |                       |                                          |                       |                      |
| <b>Change in QALYS (95% CI)</b>                                   | -0.038                                 | 0.067                 | 0.105 (-0.067,0.277)  | -0.015                                   | 0.019                 | 0.034 (-0.019,0.087) |
| <b>Directly-Elicited Utilities</b>                                |                                        |                       |                       |                                          |                       |                      |
| <b>Change in QALYS (95% CI)</b>                                   | 0.26                                   | 0.046                 | -0.214 (-0.571,0.143) | 0.097                                    | 0.116                 | 0.018 (-0.211,0.248) |

DME = diabetic macular edema; PRP = panretinal photocoagulation; QALYs = quality adjusted life years; CI = confidence intervals

\*Visual acuity letter score 69 or less (approximate Snellen equivalent 20/32 or worse) at baseline

**Table 6: Cost-Effectiveness Results with Alternative Utility Measurements**

| Utilities converted from visual acuity in the treated eye  |                                        |                      |                            |                                          |                      |                             |
|------------------------------------------------------------|----------------------------------------|----------------------|----------------------------|------------------------------------------|----------------------|-----------------------------|
|                                                            | With vision-impairing DME at baseline* |                      |                            | Without vision-impairing DME at baseline |                      |                             |
|                                                            | PRP (N = 25)                           | Ranibizumab (N = 21) | Difference                 | PRP (N = 87)                             | Ranibizumab (N = 80) | Difference                  |
| <b>Costs (95% CI)</b>                                      | \$24,520                               | \$29,574             | \$5,053 (-7,695 to 17,801) | \$7,445                                  | \$22,576             | \$15,131 (11,480 to 18,782) |
| <b>QALYs (95% CI)</b>                                      | -0.061                                 | -0.034               | 0.026 (-0.129 to 0.182)    | -0.047                                   | -0.018               | 0.029 (-0.026 to 0.084)     |
| <b>ICER</b>                                                |                                        |                      | \$191,653/QALY             |                                          |                      | \$521,771/QALY              |
| Utilities Measured on a Scale from Death to Perfect Health |                                        |                      |                            |                                          |                      |                             |
|                                                            | With vision-impairing DME at baseline* |                      |                            | Without vision-impairing DME at baseline |                      |                             |
|                                                            | PRP (N = 25)                           | Ranibizumab (N = 21) | Difference                 | PRP (N = 87)                             | Ranibizumab (N = 80) | Difference                  |
| <b>Costs (95% CI)</b>                                      | \$24,520                               | \$29,574             | \$5,053 (-7,695, 17,801)   | \$7,445                                  | \$22,576             | \$15,131 (11,480, 18,782)   |
| <b>QALYs (95% CI)</b>                                      | -0.038                                 | 0.067                | 0.105 (-0.067, 0.277)      | -0.015                                   | 0.019                | 0.034 (-0.019, 0.087)       |
| <b>ICER</b>                                                |                                        |                      | \$48,020/QALY              |                                          |                      | \$446,774/QALY              |

DME = diabetic macular edema; PRP = panretinal photocoagulation; CI = confidence interval; QALY = quality adjusted life years; ICER = incremental cost-effectiveness ratios

\*Visual acuity letter score 69 or less (approximate Snellen equivalent 20/32 or worse) at baseline

**Table 7: Incremental Cost-Effectiveness Ratios Values\* as Each Parameter Assumption is Changed from Low to High, One-at-a-time**

| Parameter\Parameter Value                  | With vision-impairing DME at baseline |           | Without vision-impairing DME at baseline |            |
|--------------------------------------------|---------------------------------------|-----------|------------------------------------------|------------|
|                                            | Low                                   | High      | Low                                      | High       |
| <b>Unit Costs (per procedure)</b>          |                                       |           |                                          |            |
| Cataract extraction with IOL placement     | \$ 55,542                             | \$ 55,593 | \$ 663,914                               | \$ 662,042 |
| Cataract extraction without IOL placement  | \$ 55,673                             | \$ 55,462 | \$ 662,978                               | \$ 662,978 |
| Diode laser (open angle glaucoma)          | \$ 55,647                             | \$ 55,488 | \$ 662,978                               | \$ 662,978 |
| Endolaser                                  | \$ 55,266                             | \$ 55,869 | \$ 662,978                               | \$ 662,978 |
| Extended ophthalmoscopy                    | \$ 55,511                             | \$ 55,624 | \$ 662,032                               | \$ 663,923 |
| Fluorescein angiography                    | \$ 55,580                             | \$ 55,555 | \$ 662,933                               | \$ 663,022 |
| Focal/grid laser (non-center involved DME) | \$ 55,591                             | \$ 55,544 | \$ 662,978                               | \$ 662,978 |
| Fundus photography                         | \$ 55,467                             | \$ 55,669 | \$ 662,772                               | \$ 663,183 |
| Intravitreal injection procedure           | \$ 55,002                             | \$ 56,133 | \$ 659,327                               | \$ 666,629 |
| 0.5-mg ranibizumab drug                    | \$ 45,032                             | \$ 66,103 | \$ 594,867                               | \$ 731,088 |
| Laser retinopexy                           | \$ 55,568                             | \$ 55,568 | \$ 662,949                               | \$ 663,007 |
| OCT                                        | \$ 55,612                             | \$ 55,524 | \$ 662,978                               | \$ 662,978 |

|                                                         |           |           |            |            |
|---------------------------------------------------------|-----------|-----------|------------|------------|
| Paracentesis                                            | \$ 55,573 | \$ 55,562 | \$ 662,971 | \$ 662,985 |
| Panretinal photocoagulation                             | \$ 56,325 | \$ 54,810 | \$ 666,376 | \$ 659,580 |
| Retinal cryopexy                                        | \$ 55,568 | \$ 55,568 | \$ 663,018 | \$ 662,938 |
| Retinal detachment repair-injection of air/gas          | \$ 55,439 | \$ 55,696 | \$ 662,978 | \$ 662,978 |
| Silicone oil Injection                                  | \$ 55,719 | \$ 55,416 | \$ 662,978 | \$ 662,978 |
| Subtenons triamcinolone acetonide injection for uveitis | \$ 55,568 | \$ 55,568 | \$ 662,983 | \$ 662,973 |
| Total air-fluid exchange                                | \$ 55,568 | \$ 55,568 | \$ 663,151 | \$ 662,805 |
| Ultrasound                                              | \$ 55,580 | \$ 55,555 | \$ 663,015 | \$ 662,941 |
| Vitrectomy                                              | \$ 55,894 | \$ 55,241 | \$ 663,539 | \$ 662,416 |
| Vitrectomy with endolaser                               | \$ 55,715 | \$ 55,420 | \$ 665,160 | \$ 660,796 |
| Vitrectomy with epiretinal membrane peel                | \$ 55,360 | \$ 55,775 | \$ 664,178 | \$ 661,778 |
| <b>Annual Costs (year 1)</b>                            |           |           |            |            |
| MI                                                      | \$ 48,529 | \$ 62,606 | \$ 662,386 | \$ 663,570 |
| CVA                                                     | \$ 75,080 | \$ 36,055 | \$ 662,326 | \$ 663,630 |
| <b>Annual Costs (year 2)</b>                            |           |           |            |            |
| MI                                                      | \$ 55,568 | \$ 55,568 | \$ 662,978 | \$ 662,978 |
| CVA                                                     | \$ 55,568 | \$ 55,568 | \$ 662,978 | \$ 662,978 |

|                                                                       |           |           |              |            |
|-----------------------------------------------------------------------|-----------|-----------|--------------|------------|
|                                                                       |           |           | 78           | 978        |
| <b>Utility associated with visual acuity in the better-seeing eye</b> |           |           |              |            |
| 20/20                                                                 | \$ 81,226 | \$ 42,228 | \$ 1,128,206 | \$ 469,411 |
| 20/25                                                                 | \$ 61,132 | \$ 50,931 | \$ 561,725   | \$ 808,760 |
| 20/30                                                                 | \$ 46,816 | \$ 68,343 | \$ 695,005   | \$ 633,772 |
| 20/40                                                                 | \$ 61,427 | \$ 50,729 | \$ 588,536   | \$ 758,978 |
| 20/50                                                                 | \$ 51,545 | \$ 60,271 | \$ 591,632   | \$ 753,891 |
| 20/70                                                                 | \$ 45,627 | \$ 71,045 | \$ 638,852   | \$ 688,998 |
| 20/100                                                                | \$ 47,268 | \$ 67,402 | \$ 623,638   | \$ 707,616 |
| 20/200                                                                | \$ 49,931 | \$ 62,639 | \$ 678,383   | \$ 648,257 |
| 20/300                                                                | \$ 59,971 | \$ 51,767 | \$ 654,039   | \$ 672,165 |
| 20/400                                                                | \$ 55,568 | \$ 55,568 | \$ 662,978   | \$ 662,978 |

DME = diabetic macular edema; IOL = intraocular lens; OCT = optical coherence tomography; MI = myocardial infarction; CVA = cerebrovascular accident.

\*All costs in 2016 United States Dollars (inflated using gross domestic product deflator, if necessary).

**Table 8: Incremental Cost-Effectiveness Ratio Values as Costs of Panretinal Photocoagulation and Anti-Vascular Endothelial Growth Factor Therapy Change\* for Eyes with Vision-Impairing Diabetic Macular Edema at Baseline**

|                          |              | Cost of PRP |             |             |             |             |             |             |             |             |
|--------------------------|--------------|-------------|-------------|-------------|-------------|-------------|-------------|-------------|-------------|-------------|
|                          |              | 200         | 300         | 400         | 500         | 600         | 700         | 800         | 900         | 1000        |
| <b>Cost of Anti-VEGF</b> | <b>1000</b>  | Cost-Saving |
|                          | <b>2000</b>  | Cost-Saving |
|                          | <b>3000</b>  | Cost-Saving |
|                          | <b>4000</b>  | Cost-Saving |
|                          | <b>5000</b>  | Cost-Saving |
|                          | <b>6000</b>  | Cost-Saving |
|                          | <b>7000</b>  | Cost-Saving |
|                          | <b>8000</b>  | Cost-Saving |
|                          | <b>9000</b>  | \$2,884     | \$689       | Cost-Saving |
|                          | <b>10000</b> | \$8,383     | \$6,187     | \$3,992     | \$1,797     | Cost-Saving | Cost-Saving | Cost-Saving | Cost-Saving | Cost-Saving |
|                          | <b>11000</b> | \$13,881    | \$11,686    | \$9,491     | \$7,295     | \$5,100     | \$2,905     | \$710       | Cost-Saving | Cost-Saving |
|                          | <b>12000</b> | \$19,379    | \$17,184    | \$14,989    | \$12,794    | \$10,599    | \$8,403     | \$6,208     | \$4,013     | \$1,818     |
|                          | <b>13000</b> | \$24,877    | \$22,682    | \$20,487    | \$18,292    | \$16,097    | \$13,902    | \$11,707    | \$9,512     | \$7,316     |
|                          | <b>14000</b> | \$30,375    | \$28,180    | \$25,985    | \$23,790    | \$21,595    | \$19,400    | \$17,205    | \$15,010    | \$12,815    |
|                          | <b>15000</b> | \$35,874    | \$33,679    | \$31,484    | \$29,288    | \$27,093    | \$24,898    | \$22,703    | \$20,508    | \$18,313    |
|                          | <b>16000</b> | \$41,372    | \$39,177    | \$36,982    | \$34,787    | \$32,592    | \$30,396    | \$28,201    | \$26,006    | \$23,811    |
|                          | <b>17000</b> | \$46,870    | \$44,675    | \$42,480    | \$40,285    | \$38,090    | \$35,895    | \$33,700    | \$31,504    | \$29,309    |
|                          | <b>18000</b> | \$52,368    | \$50,173    | \$47,978    | \$45,783    | \$43,588    | \$41,393    | \$39,198    | \$37,003    | \$34,808    |
|                          | <b>19000</b> | \$57,867    | \$55,672    | \$53,476    | \$51,281    | \$49,086    | \$46,891    | \$44,696    | \$42,501    | \$40,306    |
|                          | <b>20000</b> | \$63,365    | \$61,170    | \$58,975    | \$56,780    | \$54,584    | \$52,389    | \$50,194    | \$47,999    | \$45,804    |



PRP = panretinal photocoagulation, Anti-VEGF = anti-vascular endothelial growth factor  
\*Colors represent levels of value of ranibizumab as compared to panretinal photocoagulation. Dark green color indicates that ranibizumab saves costs and improves vision compared to panretinal photocoagulation. Light green color indicates that ranibizumab has a net cost increase and improves vision compared to panretinal photocoagulation, and the rate at which quality adjusted life years (QALY) are gained is between \$0 and \$50,000 per QALY gained. Yellow color indicates that ranibizumab has a net cost increase and improves vision compared to panretinal photocoagulation, and the rate at which QALYS are gained is between \$50,000 and \$100,000 per QALY gained.

**Table 9: Incremental Cost-Effectiveness Ratio values as costs of Panretinal Photocoagulation and Anti-Vascular Endothelial Growth Factor Therapy Change for Eyes Without Vision-Impairing Diabetic Macular Edema at Baseline\***

|                          |             | Cost of PRP |           |           |           |             |             |             |             |             |
|--------------------------|-------------|-------------|-----------|-----------|-----------|-------------|-------------|-------------|-------------|-------------|
|                          |             | 200         | 300       | 400       | 500       | 600         | 700         | 800         | 900         | 1000        |
| <b>Cost of Anti-VEGF</b> | <b>100</b>  | \$ 31,713   | \$ 21,868 | \$ 12,023 | \$ 2,178  | Cost-Saving | Cost-Saving | Cost-Saving | Cost-Saving | Cost-Saving |
|                          | <b>200</b>  | \$ 67,259   | \$ 57,414 | \$ 47,569 | \$ 37,724 | \$ 27,879   | \$ 18,034   | \$ 8,189    | Cost-Saving | Cost-Saving |
|                          | <b>300</b>  | \$102,804   | \$ 92,959 | \$ 83,114 | \$ 73,270 | \$ 63,425   | \$ 53,580   | \$ 43,735   | \$ 33,890   | \$ 24,045   |
|                          | <b>400</b>  | \$138,350   | \$128,505 | \$118,660 | \$108,815 | \$ 98,970   | \$ 89,125   | \$ 79,280   | \$ 69,436   | \$ 59,591   |
|                          | <b>500</b>  | \$173,895   | \$164,050 | \$154,205 | \$144,361 | \$134,516   | \$124,671   | \$114,826   | \$104,981   | \$ 95,136   |
|                          | <b>600</b>  | \$209,441   | \$199,596 | \$189,751 | \$179,906 | \$170,061   | \$160,216   | \$150,372   | \$140,527   | \$130,682   |
|                          | <b>700</b>  | \$244,986   | \$235,141 | \$225,297 | \$215,452 | \$205,607   | \$195,762   | \$185,917   | \$176,072   | \$166,227   |
|                          | <b>800</b>  | \$280,532   | \$270,687 | \$260,842 | \$250,997 | \$241,152   | \$231,307   | \$221,463   | \$211,618   | \$201,773   |
|                          | <b>900</b>  | \$316,077   | \$306,233 | \$296,388 | \$286,543 | \$276,698   | \$266,853   | \$257,008   | \$247,163   | \$237,318   |
|                          | <b>1000</b> | \$351,623   | \$341,778 | \$331,933 | \$322,088 | \$312,243   | \$302,399   | \$292,554   | \$282,709   | \$272,864   |
|                          | <b>1100</b> | \$387,168   | \$377,324 | \$367,479 | \$357,634 | \$347,789   | \$337,944   | \$328,099   | \$318,254   | \$308,409   |
|                          | <b>1200</b> | \$422,714   | \$412,869 | \$403,024 | \$393,179 | \$383,335   | \$373,490   | \$363,645   | \$353,800   | \$343,955   |
|                          | <b>1300</b> | \$458,260   | \$448,415 | \$438,570 | \$428,725 | \$418,880   | \$409,035   | \$399,190   | \$389,345   | \$379,501   |
|                          | <b>1400</b> | \$493,      | \$483,    | \$474,    | \$464,    | \$454,4     | \$444,5     | \$434,7     | \$424,8     | \$415,0     |

|                  |               |               |               |               |               |               |               |               |               |
|------------------|---------------|---------------|---------------|---------------|---------------|---------------|---------------|---------------|---------------|
|                  | 805           | 960           | 115           | 270           | 26            | 81            | 36            | 91            | 46            |
| <b>15<br/>00</b> | \$529,<br>351 | \$519,<br>506 | \$509,<br>661 | \$499,<br>816 | \$489,9<br>71 | \$480,1<br>26 | \$470,2<br>81 | \$460,4<br>37 | \$450,5<br>92 |
| <b>16<br/>00</b> | \$564,<br>896 | \$555,<br>051 | \$545,<br>206 | \$535,<br>362 | \$525,5<br>17 | \$515,6<br>72 | \$505,8<br>27 | \$495,9<br>82 | \$486,1<br>37 |
| <b>17<br/>00</b> | \$600,<br>442 | \$590,<br>597 | \$580,<br>752 | \$570,<br>907 | \$561,0<br>62 | \$551,2<br>17 | \$541,3<br>72 | \$531,5<br>28 | \$521,6<br>83 |
| <b>18<br/>00</b> | \$635,<br>987 | \$626,<br>142 | \$616,<br>298 | \$606,<br>453 | \$596,6<br>08 | \$586,7<br>63 | \$576,9<br>18 | \$567,0<br>73 | \$557,2<br>28 |
| <b>19<br/>00</b> | \$671,<br>533 | \$661,<br>688 | \$651,<br>843 | \$641,<br>998 | \$632,1<br>53 | \$622,3<br>08 | \$612,4<br>64 | \$602,6<br>19 | \$592,7<br>74 |
| <b>20<br/>00</b> | \$707,<br>078 | \$697,<br>233 | \$687,<br>389 | \$677,<br>544 | \$667,6<br>99 | \$657,8<br>54 | \$648,0<br>09 | \$638,1<br>64 | \$628,3<br>19 |

PRP = panretinal photocoagulation, Anti-VEGF = anti-vascular endothelial growth factor

\*Colors represent levels of value of ranibizumab as compared with panretinal photocoagulation. Dark green color indicates that ranibizumab saves costs and improves vision compared to panretinal photocoagulation. Light green color indicates that ranibizumab has a net cost increase and improves vision compared to panretinal photocoagulation, and the rate at which quality-adjusted life years (QALYs) are gained is between \$0 and \$50,000 per QALY gained. Yellow color indicates that ranibizumab has a net cost increase and improves vision compared to panretinal photocoagulation, and the rate at which QALYs are gained is between \$50,000 and \$100,000 per QALY gained. Orange color indicates that ranibizumab has a net cost increase and improves vision compared to panretinal photocoagulation, and the rate at which QALYs are gained is between \$100,000 and \$150,000 per QALY gained. Red color indicates that ranibizumab has a net cost increase and improves vision compared to panretinal photocoagulation, and the rate at which QALYs are gained is above \$150,000 per QALY gained.

Table 10: Letter Changes in Eyes

| <b>Study Group</b>                    | <b>Letter-Years Gained<br/>(study eye)</b> | <b>Letter-Years Gained<br/>(study eye)</b> |
|---------------------------------------|--------------------------------------------|--------------------------------------------|
| <i>With Diabetic Macular Edema</i>    |                                            |                                            |
| <b>PRP</b>                            | 1.8                                        | 1.2                                        |
| <b>Ranibizumab</b>                    | 7.9                                        | 6.8                                        |
| <i>Without Diabetic Macular Edema</i> |                                            |                                            |
| <b>PRP</b>                            | -1.8                                       | 0.2                                        |
| <b>Ranibizumab</b>                    | 2.5                                        | 2.0                                        |

**Table 11: Percentage Changes in Quality-of-Life**

| <b>Study Group</b>                    | <b>Starting utility</b> | <b>Anticipated QALYs over 2 years *</b> | <b>QALYs lost over 2 years (excluding deaths)</b> | <b>QALYs lost over 2 years (including deaths)</b> | <b>% QALYs lost over 2 years (excluding deaths)</b> | <b>% QALYs lost over 2 years (including deaths)</b> |
|---------------------------------------|-------------------------|-----------------------------------------|---------------------------------------------------|---------------------------------------------------|-----------------------------------------------------|-----------------------------------------------------|
| <i>With Diabetic Macular Edema</i>    |                         |                                         |                                                   |                                                   |                                                     |                                                     |
| PRP                                   | 0.82                    | 1.64                                    | 0.000                                             | -0.070                                            | 0.0%                                                | -4.3%                                               |
| Ranibizumab                           | 0.80                    | 1.60                                    | 0.118                                             | 0.028                                             | 7.4%                                                | 1.7%                                                |
| <i>Without Diabetic Macular Edema</i> |                         |                                         |                                                   |                                                   |                                                     |                                                     |
| PRP                                   | 0.88                    | 1.75                                    | -0.010                                            | -0.032                                            | -0.6%                                               | -1.9%                                               |
| Ranibizumab                           | 0.87                    | 1.75                                    | 0.020                                             | -0.008                                            | 1.2%                                                | -0.5%                                               |

\* Assuming no vision changes, no deaths

## References

1. Brown MM, Brown GC, Sharma S, Landy J. Health care economic analyses and value-based medicine. *Surv Ophthalmol*. 2003;48(2):141-3.
2. Mitchell P, Annemans L, Gallagher M, et al. Cost-effectiveness of ranibizumab in treatment of diabetic macular oedema (DME) causing visual impairment: evidence from the RESTORE trial. *Br J Ophthalmol*. 2012;96(5):688-93.
3. Czoski-Murray C, Carlton J, Brazier J, Young T, Papo NL, Kang HK. Valuing condition-specific health states using simulation contact lenses. *Value Health*. 2009;12(5):793-9.
4. Services CfMaM. Medicare fee for service payment: Physician fee schedule. <https://www.cms.gov/Medicare/Medicare-Fee-For-Service-Payment/PhysicianFeeSched/Index.html>. Accessed 16 September 2016.
5. Bonafede MM, Johnson BH, Richhariya A, Gandra SR. Medical costs associated with cardiovascular events among high-risk patients with hyperlipidemia. *Clinicoecon Outcomes Res*. 2015;7:337-45.
6. Owsley C, McGwin G, Jr., Scilley K, Kallies K. Development of a questionnaire to assess vision problems under low luminance in age-related maculopathy. *Invest Ophthalmol Vis Sci*. 2006;47(2):528-35.
7. Mangione CM, Lee PP, Gutierrez PR, Spritzer K, Berry S, Hays RD. Development of the 25-item National Eye Institute Visual Function Questionnaire. *Arch Ophthalmol*. 2001;119(7):1050-8.
8. Reilly MC, Zbrozek AS, Dukes EM. The validity and reproducibility of a work productivity and activity impairment instrument. *Pharmacoeconomics*. 1993;4(5):353-65.
